# Supplementary material for: Electron-Enriched Pd Nanoparticles for Selective Hydrogenation of Halonitrobenzenes to Haloanilines
Source: MDPI journal article supplement (doi:10.3390/catal11050543), 2021-04-23
Supplement: s1 [file s1]

# Supplementary Materials: Electron-Enriched Pd Nanoparticles for Selective Hydrogenation of Halonitrobenzenes to Haloanilines

Zeichen Liang <sup>1</sup>, Mingkai Zhang <sup>1</sup>, Sai Zhang <sup>2,\*</sup> and Yongquan Qu <sup>1,2,\*</sup>

<sup>1</sup> Frontier Institute of Science and Technology, Xi'an Jiaotong University, Xi'an 710049, China; xj3118128001@stu.xjtu.edu.cn (Z.L.); zmk0102@stu.xjtu.edu.cn (M.Z.)

<sup>2</sup> Key Laboratory of Special Functional and Smart Polymer Materials of Ministry of Industry and Information Technology, School of Chemistry and Chemical Engineering, Northwestern Polytechnical University, Xi'an 710072, China

\* Correspondence: yongquan@mail.xjtu.edu.cn (Y.Q.); zhangsai1112@nwpu.edu.cn (S.Z.)

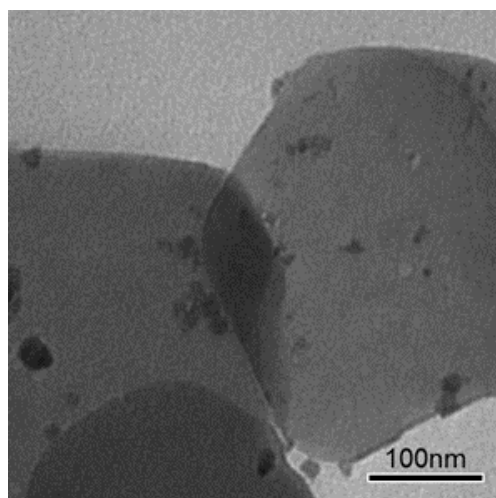

**Figure S1.** TEM image of CoFe-LDHs supports.

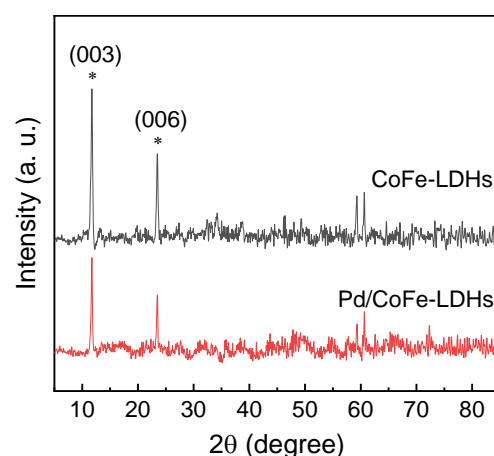

**Figure S2.** XRD patterns of the CoFe-LDHs supports and Pd/CoFe-LDHs catalyst.

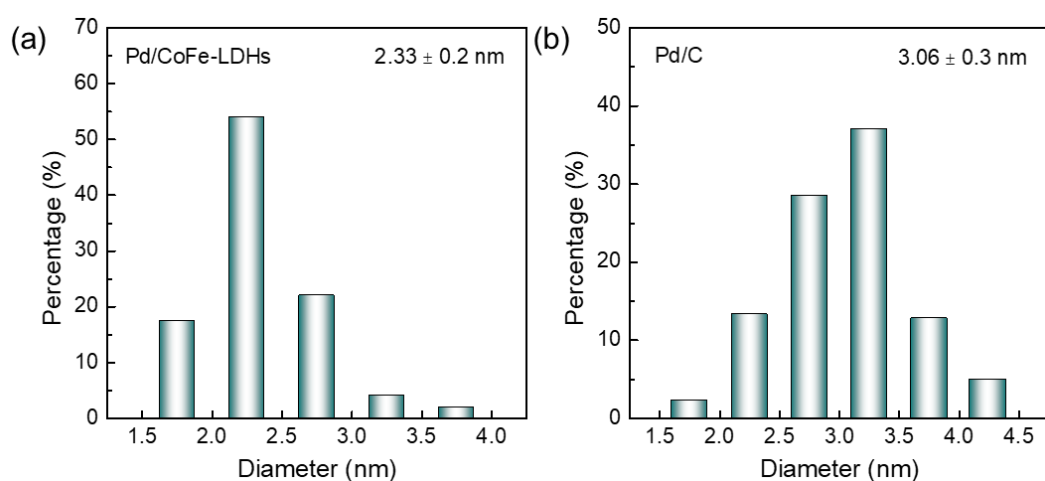

**Figure S3.** (a) Size distribution of Pd nanoparticles in Pd/CoFe-LDHs catalyst; (b) Size distribution of Pd nanoparticles in Pd/C catalyst.

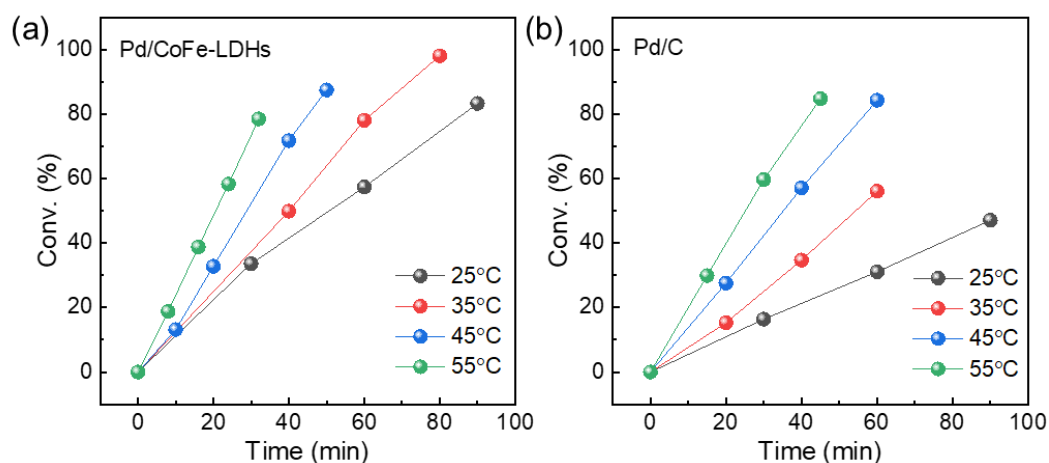

**Figure S4.** (a) The conversion of *p*-CNB at various reaction temperature catalyzed by Pd/CoFe-LDHs; (b) The conversion of *p*-CNB at various reaction temperature catalyzed by Pd/C. Reaction conditions: *p*-CNB (1.0 mmol), catalysts (10.0 mg), isopropanol (2.0 mL), and 0.5 MPa of H<sub>2</sub>.

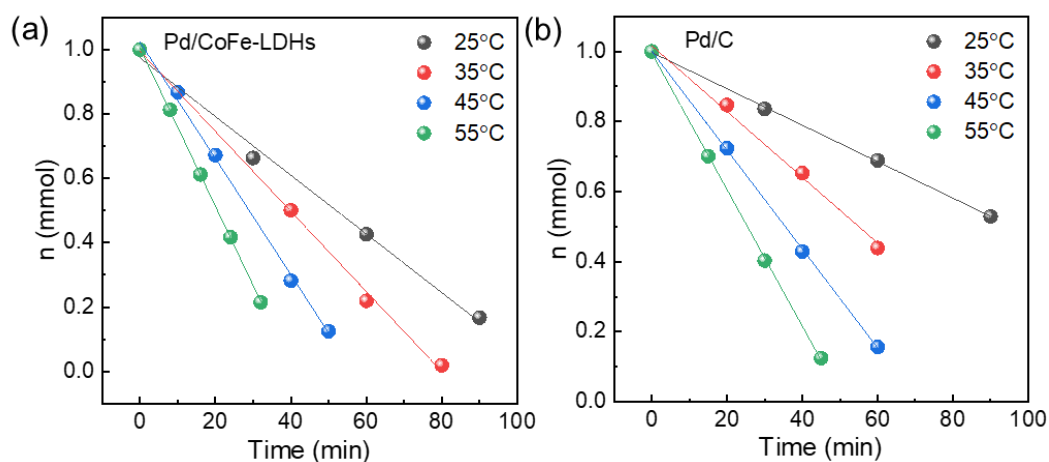

**Figure S5.** (a) The amount of *p*-CNB as a function of reaction time at various temperatures catalyzed by Pd/CoFe-LDHs; (b) The amount of *p*-CNB as a function of reaction time at various temperatures catalyzed by Pd/C.

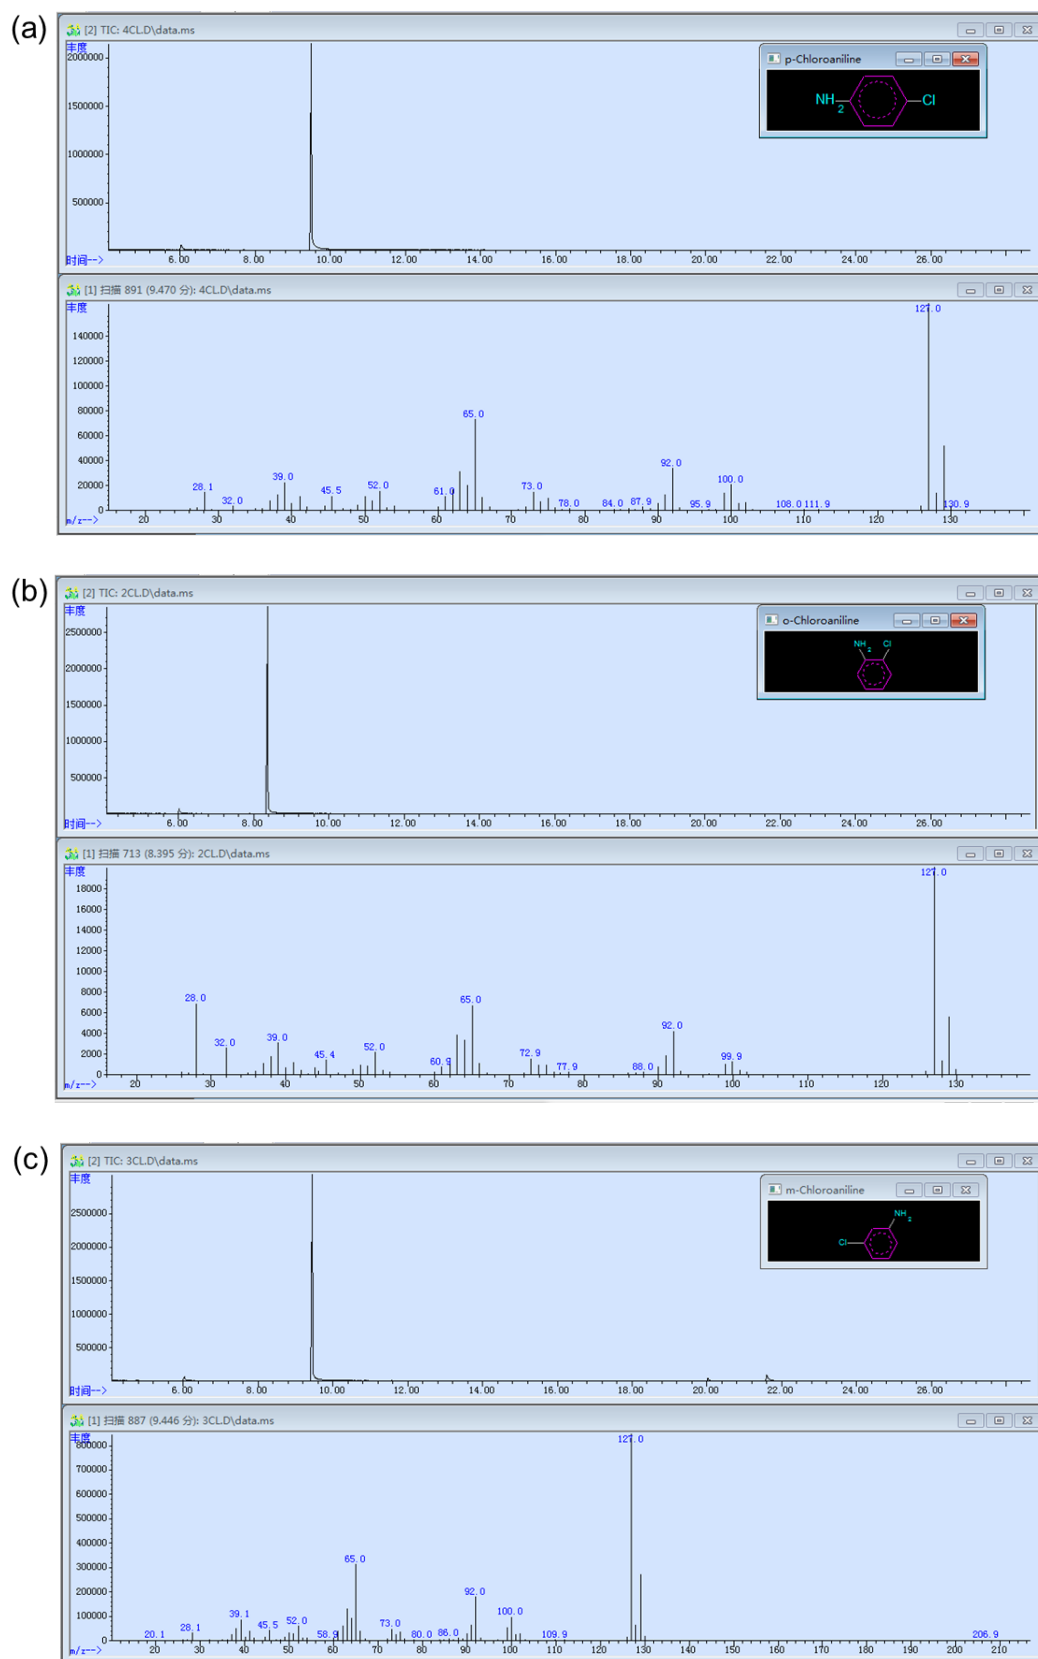

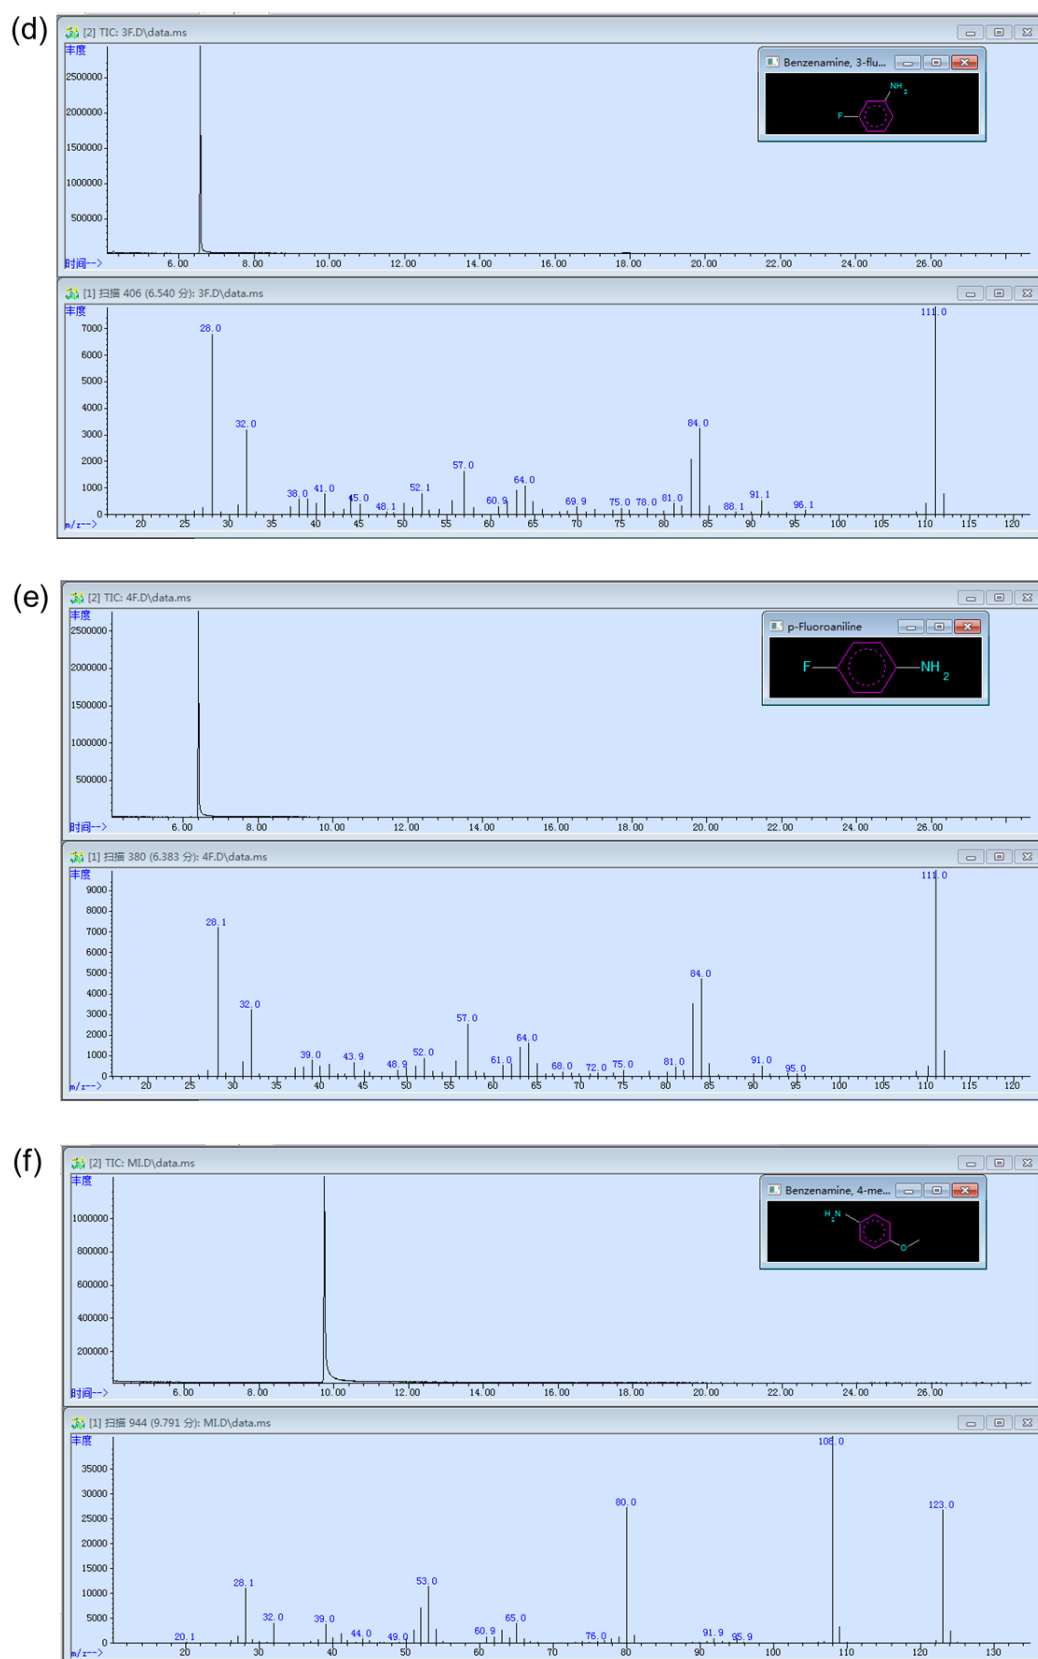

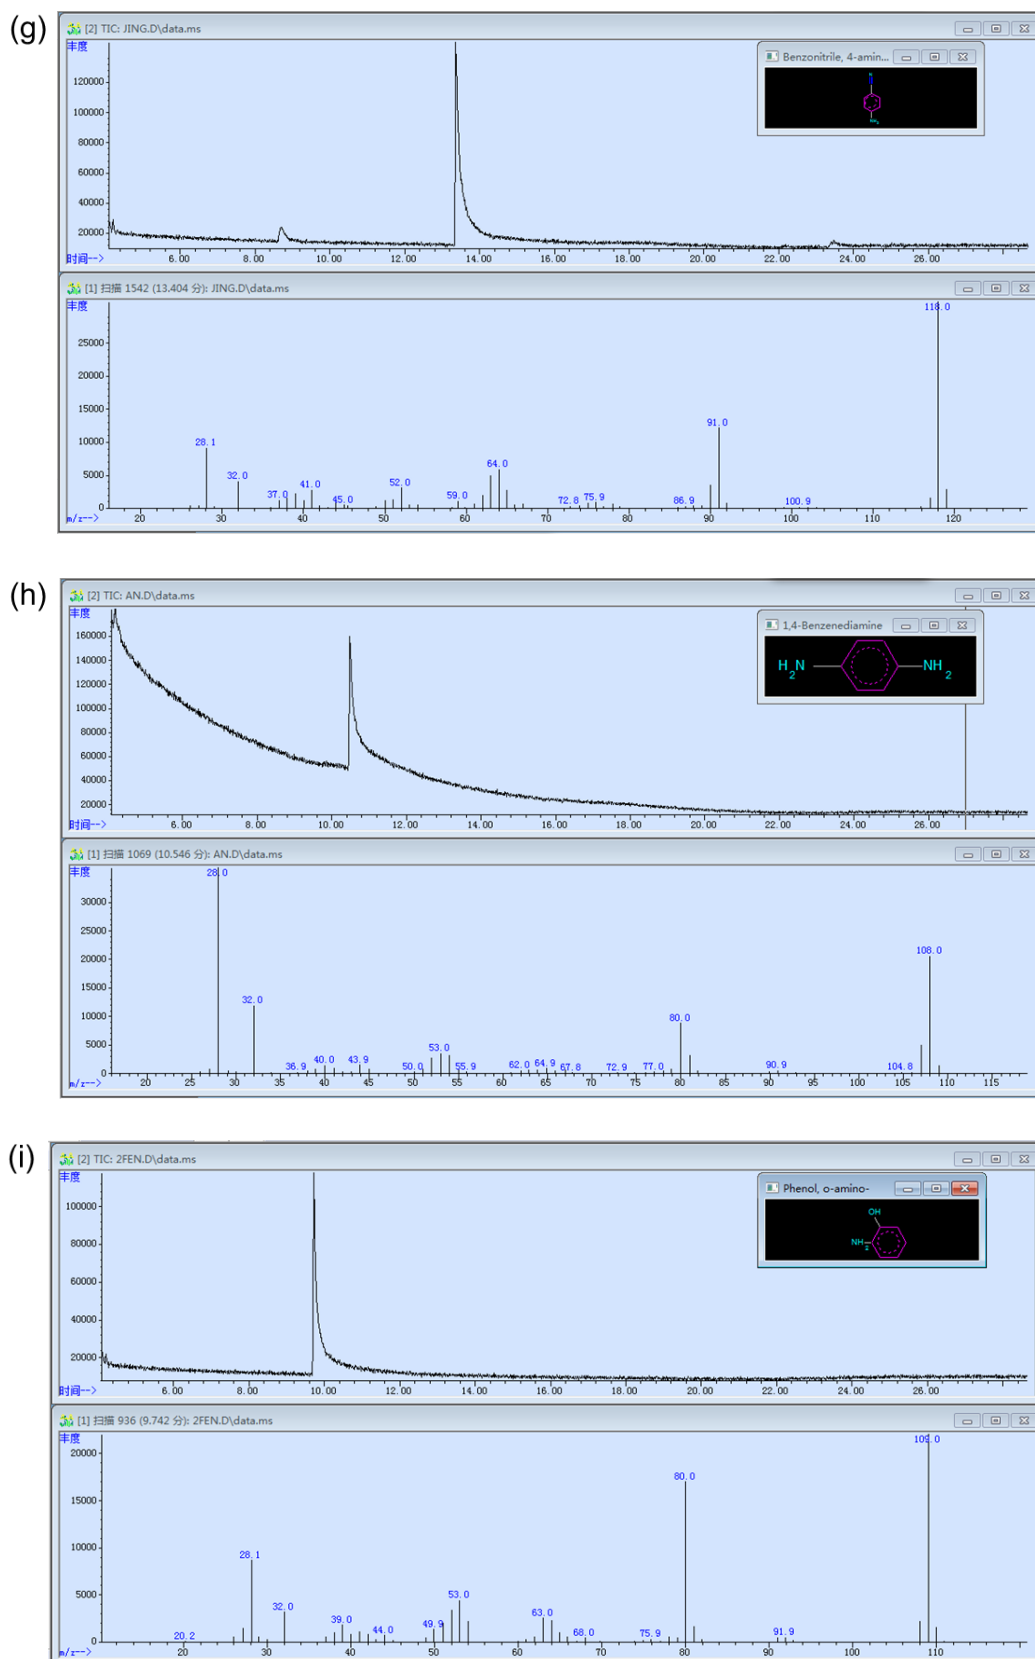

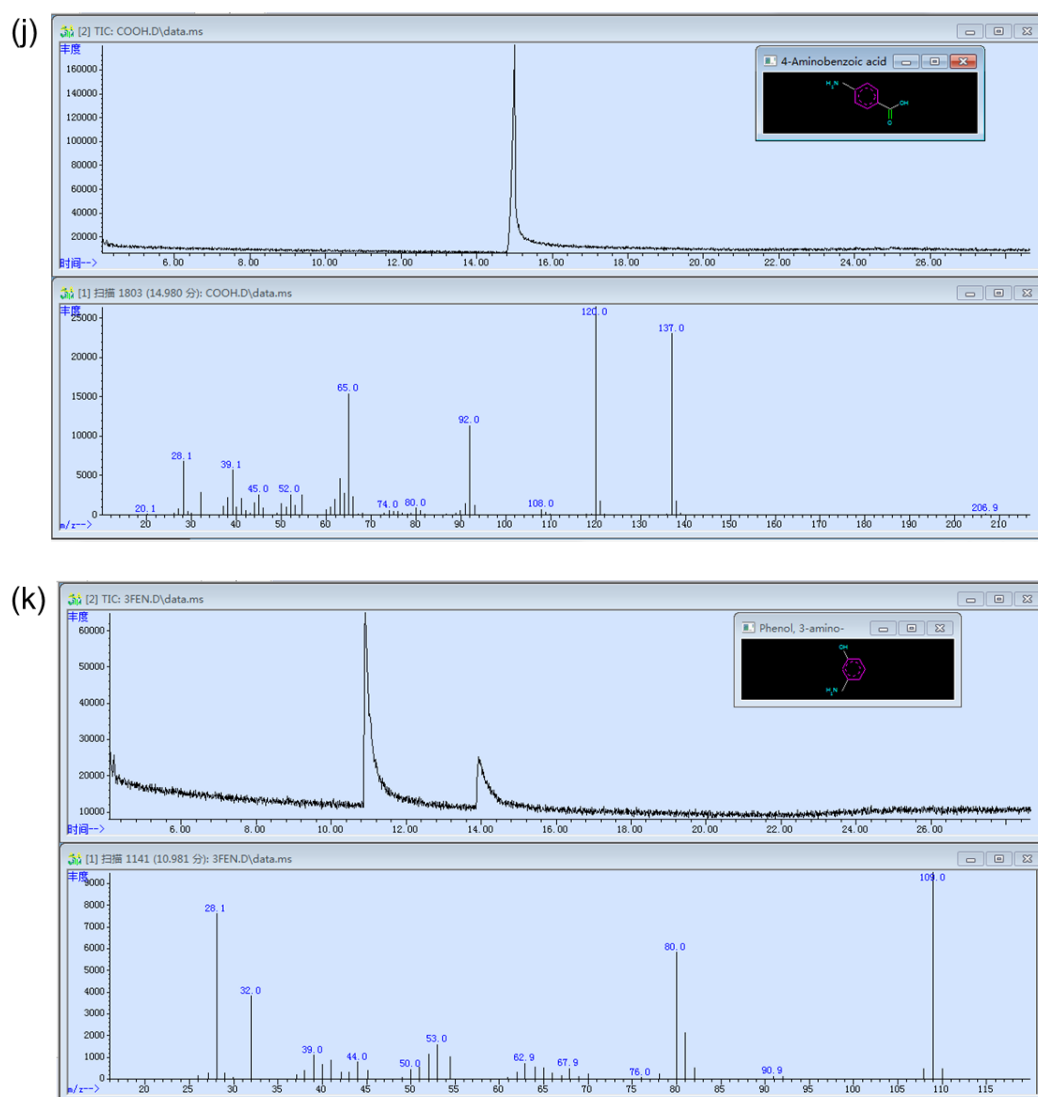

**Figure S6.** The GC-MS spectra of hydrogenation of (a) *para*-chloronitrobenzene (*p*-CNB), (b) *ortho*-chloronitrobenzene, (c) *meta*-chloronitrobenzene, (d) 3-fluoro-nitrobenzene, (e) 4-fluoro-nitrobenzene, (f) 4-nitroanisole, (g) 4-nitrobenzonitrile, (h) 4-nitroaniline, (i) 2-nitrophenol, (j) 4-nitrobenzoic acid, (k) 3-nitrophenol.

**Table S1.** Hydrogenation of *p*-CNB under different conditions.

| Entry | Solvents    | T (°C) | P (Mpa) | Time (min) | Conv. (%) | Sel. (%) |
|-------|-------------|--------|---------|------------|-----------|----------|
| 1     | Toluene     | 25     | 0.5     | 120        | 11.9      | 78.7     |
| 2     | Cyclohexane | 25     | 0.5     | 120        | 18.9      | 81.8     |
| 3     | Methanol    | 25     | 0.5     | 120        | 99.9      | 62.7     |
| 4     | Ethanol     | 25     | 0.5     | 120        | 99.9      | 85.5     |
| 5     | Isopropanol | 25     | 0.5     | 120        | 97.4      | 93.5     |
| 6     | Isopropanol | 35     | 0.5     | 80         | 98.1      | 89.4     |
| 7     | Isopropanol | 45     | 0.5     | 60         | 99.9      | 90.1     |
| 8     | Isopropanol | 55     | 0.5     | 40         | 98.5      | 90.6     |
| 9     | Isopropanol | 25     | 1       | 60         | 70.8      | 90.7     |
| 10    | Isopropanol | 25     | 1.5     | 60         | 99.9      | 91.5     |

Reaction conditions: *p*-CNB (1.0 mmol), catalysts (10.0 mg), solvents (2.0 mL).

**Equation S1:** The Pd dispersion (D) was calculated according to:

$$D = \frac{1.11}{d}$$

Where d is the mean diameter of Pd nanoparticles (nm).

**Equation S2:** The TOF value was calculated according to:

$$\text{TOF} = \frac{n_0 \times \text{Conv.}}{\frac{m_{\text{cat.}} \times \text{wt\%Pd} \times D}{M_{\text{Pd}}} \times t}$$

Where  $n_0$  is the mole of initial substrate, Conv. is the conversion of substrates,  $m_{\text{cat.}}$  is the weight of catalyst, wt%Pd is the actual loading content of Pd, D is the dispersion of Pd,  $M_{\text{Pd}}$  is the atomic weight of Pd, and t is the reaction time (h).
